# Supplementary material for: An integrative, multi-scale, genome-wide model reveals the phenotypic landscape of Escherichia coli
Source: PubMed Central journal article supplement (PMC4299492; doi:10.15252/msb.20145108), 2014-07-01
Supplement: msb0010-0735-sd2.pdf [file msb0010-0735-sd2.pdf]

**Supplementary Table S1** *E. coli* mutant strains

| Strain   | Genotype                                                                                                                                                                             | Source                              | M9 supplement                  |
|----------|--------------------------------------------------------------------------------------------------------------------------------------------------------------------------------------|-------------------------------------|--------------------------------|
| MG1655   | Wild type                                                                                                                                                                            | Lab collection                      | As required                    |
| JW0195-1 | F-, $\Delta$ ( <i>araD-araB</i> )567, <b><i>AmetN724::kan</i></b> , $\Delta$ <i>lacZ4787::rrnB-3</i> , $\lambda^-$ , <i>rph-1</i> , $\Delta$ ( <i>rhaD-rhaB</i> )568, <i>hsdR514</i> | <i>E. coli</i> Genetic Stock Center | <i>L</i> -methionine           |
| JW3911-1 | F-, $\Delta$ ( <i>araD-araB</i> )567, $\Delta$ <i>lacZ4787::rrnB-3</i> , $\lambda^-$ , <i>rph-1</i> , $\Delta$ ( <i>rhaD-rhaB</i> )568, <b><i>AmetL727::kan</i></b> , <i>hsdR514</i> | <i>E. coli</i> Genetic Stock Center | <i>L</i> -methionine           |
| JW1733-1 | F-, $\Delta$ ( <i>araD-araB</i> )567, $\Delta$ <i>lacZ4787::rrnB-3</i> , $\lambda^-$ , <b><i>AastE742::kan</i></b> , <i>rph-1</i> , $\Delta$ ( <i>rhaD-rhaB</i> )568, <i>hsdR514</i> | <i>E. coli</i> Genetic Stock Center | <i>L</i> -arginine             |
| JW2732-1 | F-, $\Delta$ ( <i>araD-araB</i> )567, $\Delta$ <i>lacZ4787::rrnB-3</i> , $\lambda^-$ , <b><i>AcysH764::kan</i></b> , <i>rph-1</i> , $\Delta$ ( <i>rhaD-rhaB</i> )568, <i>hsdR514</i> | <i>E. coli</i> Genetic Stock Center | <i>L</i> -cysteine             |
| JW3331-2 | F-, $\Delta$ ( <i>araD-araB</i> )567, $\Delta$ <i>lacZ4787::rrnB-3</i> , $\lambda^-$ , <b><i>AcysG776::kan</i></b> , <i>rph-1</i> , $\Delta$ ( <i>rhaD-rhaB</i> )568, <i>hsdR514</i> | <i>E. coli</i> Genetic Stock Center | <i>L</i> -cysteine             |
| JW3878-2 | F-, $\Delta$ ( <i>araD-araB</i> )567, $\Delta$ <i>lacZ4787::rrnB-3</i> , $\lambda^-$ , <i>rph-1</i> , $\Delta$ ( <i>rhaD-rhaB</i> )568, <b><i>ArhaT767::kan</i></b> , <i>hsdR514</i> | <i>E. coli</i> Genetic Stock Center | <i>L</i> -rhamnose monohydrate |
| JW3731-1 | F-, $\Delta$ ( <i>araD-araB</i> )567, $\Delta$ <i>lacZ4787::rrnB-3</i> , $\lambda^-$ , <i>rph-1</i> , <b><i>ArbsK781::kan</i></b> , $\Delta$ ( <i>rhaD-rhaB</i> )568, <i>hsdR514</i> | <i>E. coli</i> Genetic Stock Center | <i>D</i> -ribose               |
| JW0740-3 | F-, $\Delta$ ( <i>araD-araB</i> )567, $\Delta$ <i>lacZ4787::rrnB-3</i> , <b><i>AgalK729::kan</i></b> , $\lambda^-$ , <i>rph-1</i> , $\Delta$ ( <i>rhaD-rhaB</i> )568, <i>hsdR514</i> | <i>E. coli</i> Genetic Stock Center | <i>D</i> -galactose            |
| JW5628-1 | F-, $\Delta$ ( <i>araD-araB</i> )567, $\Delta$ <i>lacZ4787::rrnB-3</i> , $\lambda^-$ , <i>rph-1</i> , <b><i>AdgoA729::kan</i></b> , $\Delta$ ( <i>rhaD-rhaB</i> )568, <i>hsdR514</i> | <i>E. coli</i> Genetic Stock Center | <i>D</i> -galactose            |
| JW2388-1 | F-, $\Delta$ ( <i>araD-araB</i> )567, $\Delta$ <i>lacZ4787::rrnB-3</i> , $\lambda^-$ , <b><i>AmntH729::kan</i></b> , <i>rph-1</i> , $\Delta$ ( <i>rhaD-rhaB</i> )568, <i>hsdR514</i> | <i>E. coli</i> Genetic Stock Center | Ferrous sulphate heptahydrate  |
