# Supplementary material for: An integrative, multi-scale, genome-wide model reveals the phenotypic landscape of Escherichia coli
Source: PubMed Central journal article supplement (PMC4299492; doi:10.15252/msb.20145108), 2014-07-01
Supplement: msb0010-0735-sd15.pdf [file msb0010-0735-sd15.pdf]

## Supplementary File legends

**Supplementary file S1:** Compressed files of the *EcoMAC* transcriptional compendium. Text files contain normalized gene expression values. The 4,189 rows and 2,189 columns correspond to genes and arrays, respectively.

**Supplementary file S2:** Description of the 2,189 arrays included in the *EcoMAC* and *EcoPhe* compendia.

**Supplementary file S3:** Transcriptional regulatory interactions that have been verified experimentally.

**Supplementary file S4:** Inferred transcriptional interactions based on *EcoMAC* expression data.

**Supplementary file S5:** The *EcoST* Signal transduction compendium.

**Supplementary file S6:** Description of the metabolic sources and experiments used for environmental prediction (Section 5).

**Supplementary file S7:** Ranked list of genes that maximize (i) the GO terms coverage, (ii) gene expression diversity in gene knockouts and (iii) the gene expression diversity under environmental conditions (Section 7).

**Supplementary file S8:** List of genes and biological processes that were significantly altered after inclusion of the new phenotypes that were experimentally measured.

**Supplementary file S9:** Growth rate measurements for the 28 phenotypes (section 7.4).

**Supplementary file S10:** MatLab code for the integrative model containing the two novel methods, EBA and TRAME, and Cytoscape files for the network showed in [Fig. 3](#) and [5](#).

**Supplementary file S11:** Correlations between measured and predicted growth rates by using M, ME models and the integrative model, and gene essentiality evaluated by the integrative model.
